# Supplementary material
Source: publisher figshare collection journal article supplement (https://karger.figshare.com/articles/dataset/_/14827701)
Supplement: Supplementary file 1 [file 1]

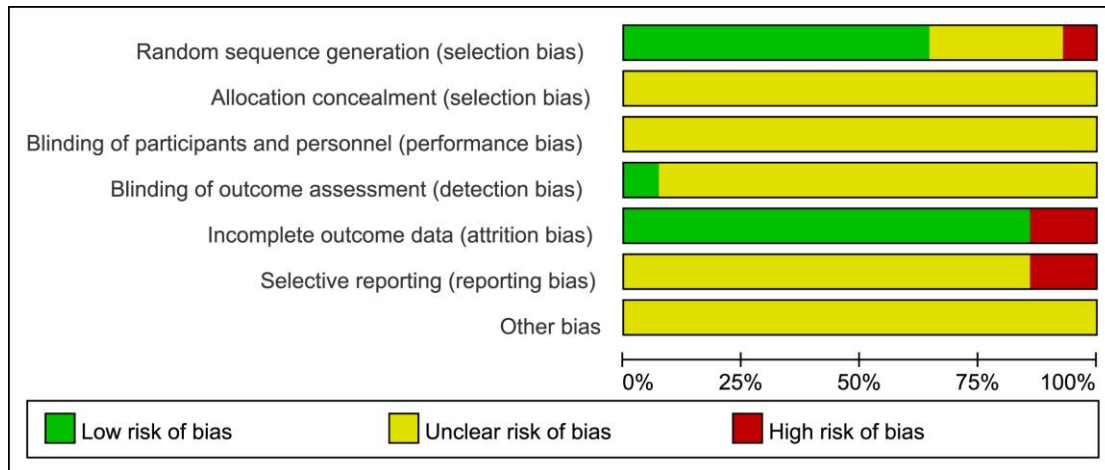

|                   | Random sequence generation (selection bias) | Allocation concealment (selection bias) | Blinding of participants and personnel (performance bias) | Blinding of outcome assessment (detection bias) | Incomplete outcome data (attrition bias) | Selective reporting (reporting bias) | Other bias |
|-------------------|---------------------------------------------|-----------------------------------------|-----------------------------------------------------------|-------------------------------------------------|------------------------------------------|--------------------------------------|------------|
| Chen et al.2015   | +                                           | ?                                       | ?                                                         | ?                                               | +                                        | ?                                    | ?          |
| Fan et al.2017    | +                                           | ?                                       | ?                                                         | ?                                               | +                                        | ?                                    | ?          |
| Han et al.2013    | ?                                           | ?                                       | ?                                                         | +                                               | +                                        | +                                    | ?          |
| He et al.2015     | +                                           | ?                                       | ?                                                         | ?                                               | +                                        | ?                                    | ?          |
| Ji et al.2011     | +                                           | ?                                       | ?                                                         | ?                                               | +                                        | ?                                    | ?          |
| Li et al.2011     | +                                           | ?                                       | ?                                                         | ?                                               | +                                        | ?                                    | ?          |
| Liu et al.2000    | ?                                           | ?                                       | ?                                                         | ?                                               | +                                        | ?                                    | ?          |
| Luo et al.2008    | +                                           | ?                                       | ?                                                         | ?                                               | +                                        | ?                                    | ?          |
| Nie 2011          | ?                                           | ?                                       | ?                                                         | ?                                               | +                                        | ?                                    | ?          |
| Song et al.2018   | +                                           | ?                                       | ?                                                         | ?                                               | +                                        | ?                                    | ?          |
| Wu et al.2018     | +                                           | ?                                       | ?                                                         | ?                                               | +                                        | +                                    | ?          |
| Yang and Guo 2017 | +                                           | ?                                       | ?                                                         | ?                                               | +                                        | ?                                    | ?          |
| Zhang 2007        | +                                           | ?                                       | ?                                                         | ?                                               | +                                        | ?                                    | ?          |
| Zhang et al.1994  | ?                                           | ?                                       | ?                                                         | ?                                               | +                                        | ?                                    | ?          |
